# Supplementary material for: Exploring the relevance of gas-phase structures to biology: cold ion spectroscopy of the decapeptide neurokinin A
Source: Royal Society of Chemistry journal article supplement (doi:10.1039/c6cp07953a), 2017-01-01
Supplement: c6cp07953a1.pdf [file c6cp07953a1.pdf]

## Supporting Information

### Exploring the Relevance of Gas-phase Structures to Biology: Cold Ion Spectroscopy of the Decapeptide Neurokinin A.

Aleksandr Y. Pereverzev, and Oleg V. Boyarkin<sup>1</sup>

<sup>a</sup>Laboratoire de Chimie Physique Moléculaire, Ecole Polytechnique Fédérale de Lausanne, EPFL SB ISIC LCPM, Station 6, CH-1015 Lausanne, Switzerland

#### Chemicals

Neurokinin A (Abcam Biochemicals) was purchased and used without further purification. Peptide solution at 50  $\mu\text{M}$  concentration was prepared in mixtures of 100/0, 50/50 and 0/100 water/methanol solvents with 1% of acetic acid.

#### Photofragmentation mass spectrum of NKA

Figure S1 shows photofragmentation mass spectrum for doubly protonated NKA. UV laser wavenumber is fixed at  $37431\text{ cm}^{-1}$ . The lightest of the detected fragments (Figure S1) corresponds to the loss of the Phe side chain, which is a well-known prompt fragmentation channel, specific to electronic excitation of Phe chromophore. The two most abundant fragments correspond to the loss of neutrals with the masses correspond

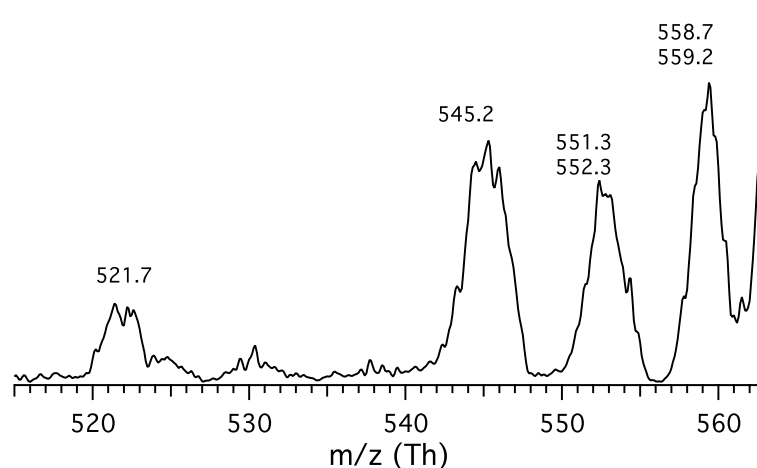

**Figure S1.** UV-induced photofragmentation mass spectrum of doubly protonated NKA. The rising edge of the largely prevailing parent ion ( $m/z=567.7\text{ Th}$ ) is visible on the right.

<sup>1</sup> email : oleg.boiarkin@epfl.ch

to the loss of  $\text{NH}_3$  (ammonia) from the Lys side chain,  $\text{H}_2\text{O}$  loss from Asp or Ser side chains and  $\text{COOH}$  loss from Asp side chain. The peak near 552 Th might correspond to  $[\text{b}_5 - \text{NH}_3]^{1+}$  or  $[\text{b}_5 - \text{H}_2\text{O}]^{1+}$  fragment.

### UV spectrum of NKA dissolved in 1:1 water-methanol solution.

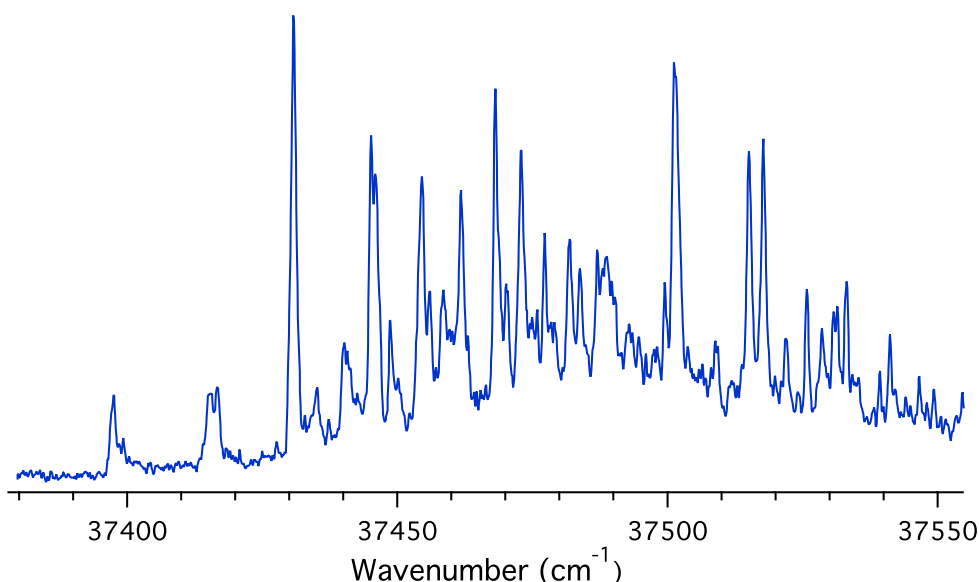

**Figure S2.** UV photofragmentation spectra of doubly protonated NKA dissolved in 50:50 water-methanol solution with 1% of acetic acid. The spectra were measured by detecting all fragments within 540 to 556 Th window of  $m/z$ .

### IR-UV “hole-burning” spectroscopy

Figure S3 shows IR depletion spectra of five NKA conformers in the  $3400\text{-}3700\text{ cm}^{-1}$  region, where vibrational transitions are well resolved. For each of the five conformers, except the conformer IV, we have chosen a unique vibrational transition, labelled in figure S3 with the corresponding numbers. The corresponding hole-burning spectra are shown in figure S4.

All well-resolved vibrational transitions of conformer IV strongly overlap with transitions of other conformers. We therefore recorded the “hole-burning” spectra of these conformers while exciting the transition that belongs to both conformers I and IV. Provided that we have already identified all the UV peaks, associated with conformer I, we may assume that the additionally removed electronic transitions belong to the conformer IV.

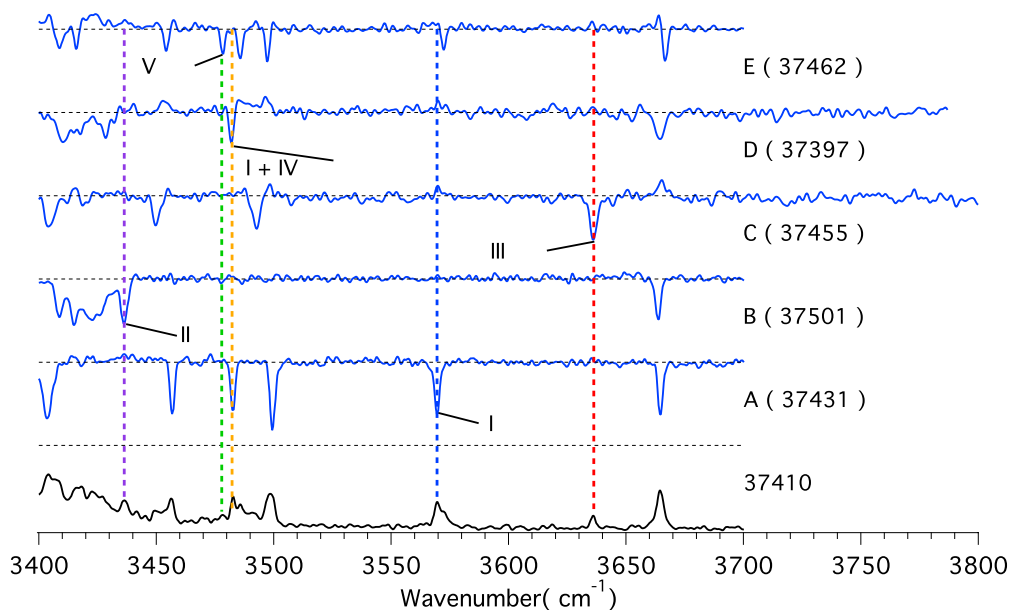

**Figure S3.** Unique vibrational peaks of each conformer, used for IR-UV "hole-burning" spectroscopy.

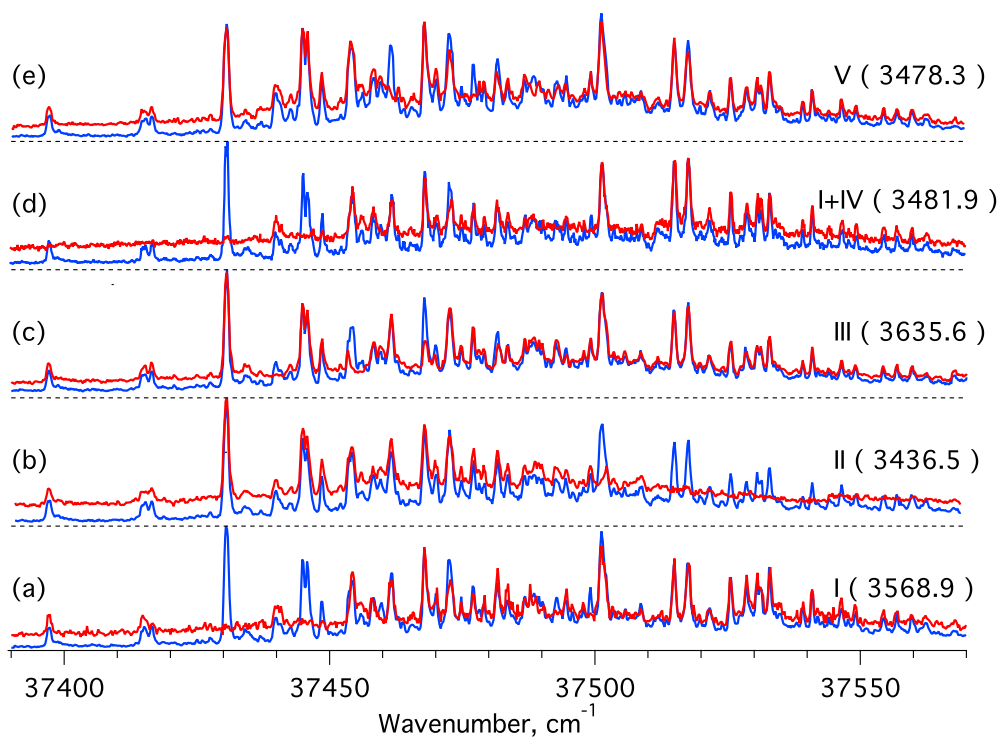

**Figure S4.** IR-UV "hole-burning" spectra of NKA. (a)-(e) correspond to IR laser wavenumber fixed at vibrational transitions, marked I – V in Fig. S3, respectively.
